# Supplementary material
Source: publisher figshare collection journal article supplement (https://tandf.figshare.com/ndownloader/files/13514354)
Supplement: Supplementary file 1 [file 13514354]

**Innovative green synthesis of 4-aryl-pyrazolo[5,6]pyrano[2,3-*d*]pyrimidines under catalyst-free conditions**

Rathinam Ramesh,a Velmurugan Tamilselvi,a Pullar Vadivel,b Appaswami Lalitha*,a

*a Department of Chemistry, Periyar University, Periyar Palkalai Nagar, Salem-636011, Tamil Nadu, India.*

*b Department of Chemistry, Salem Sowdeswari College, Salem-636010, Tamil Nadu, India.*

*E-mail: lalitha2531@yahoo.co.in*


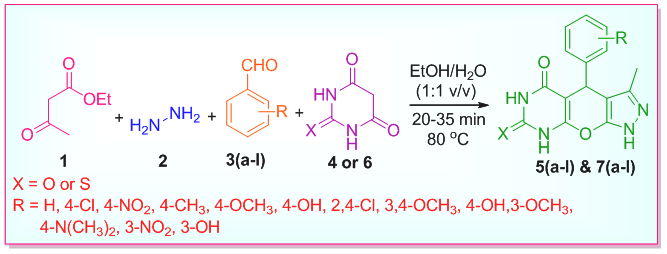


General schematic representation of the preparation of fused heterocyclic compounds


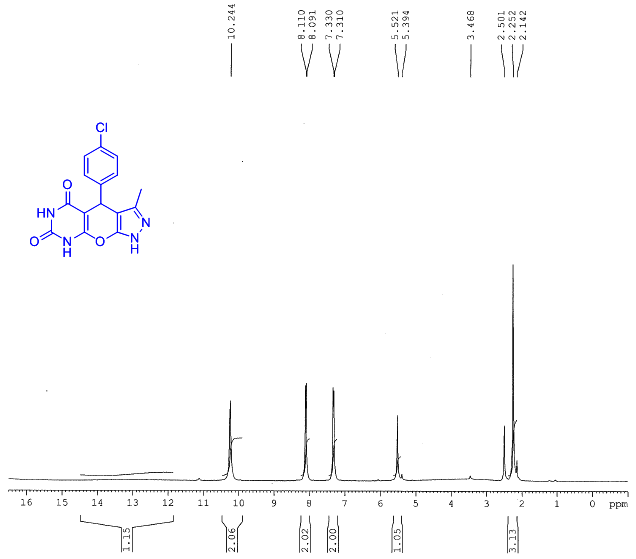


1H NMR Spectrum of compound **5b**


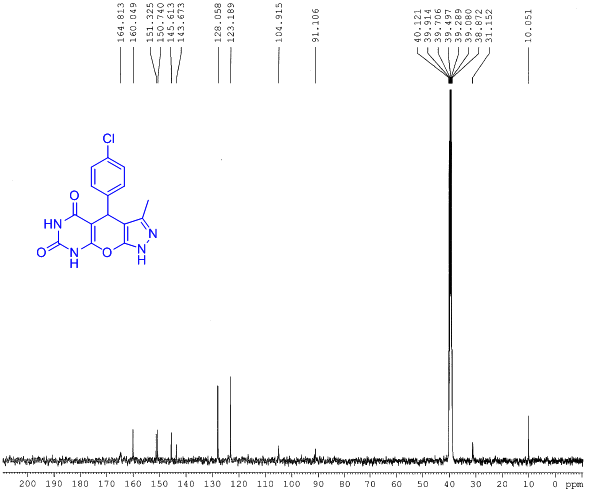


13C NMR Spectrum of compound **5b**

FT-IR Spectrum of compound **5b**


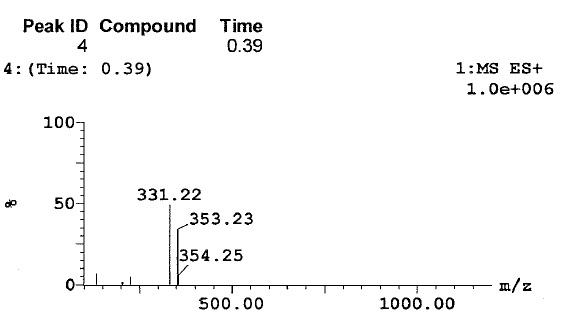


Mass Spectrum of compound **5b**


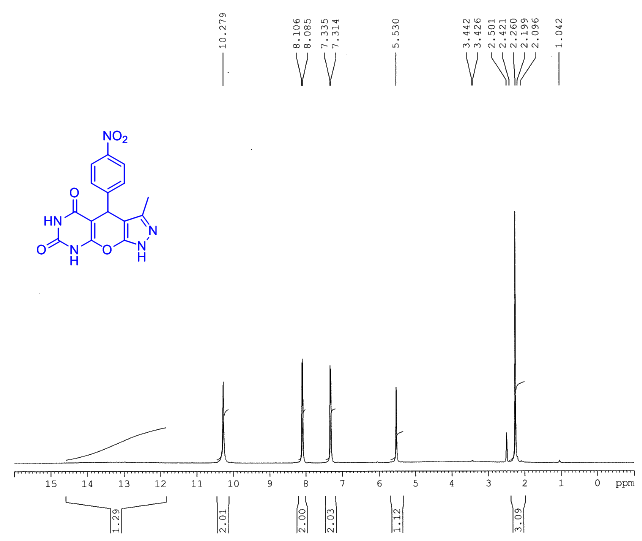


1H NMR Spectrum of compound **5c**


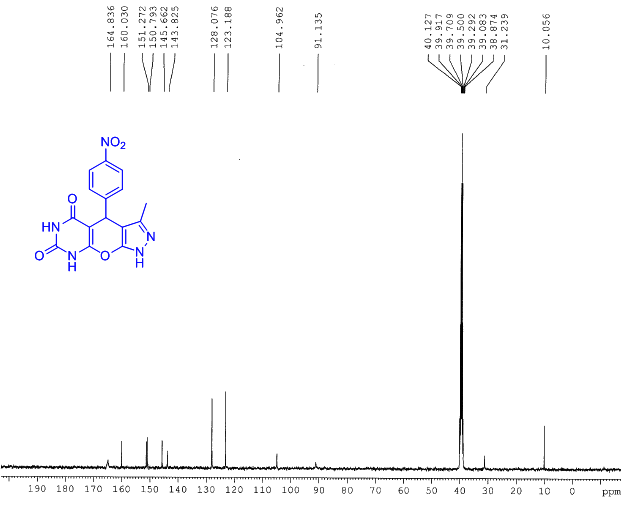


13C NMR Spectrum of compound **5c**


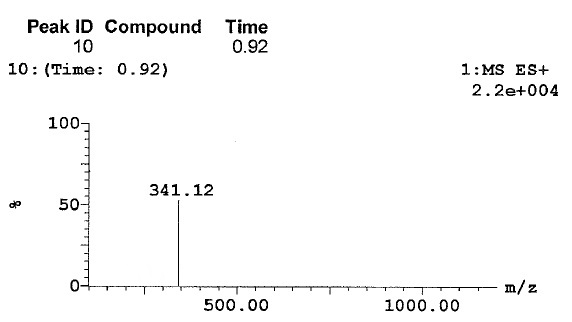


Mass Spectrum of compound **5c**


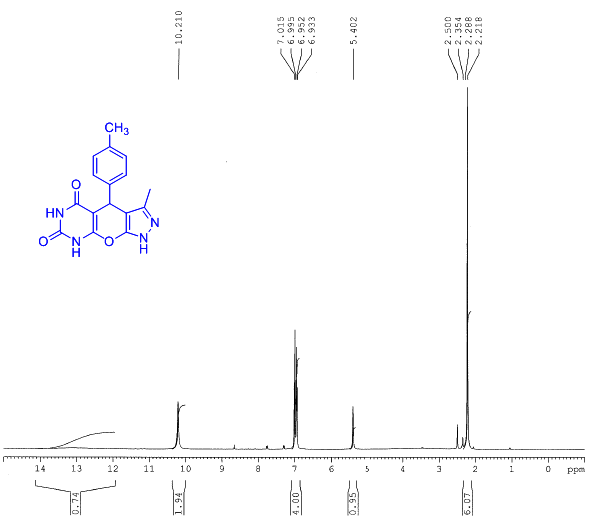


1H NMR Spectrum of compound **5d**


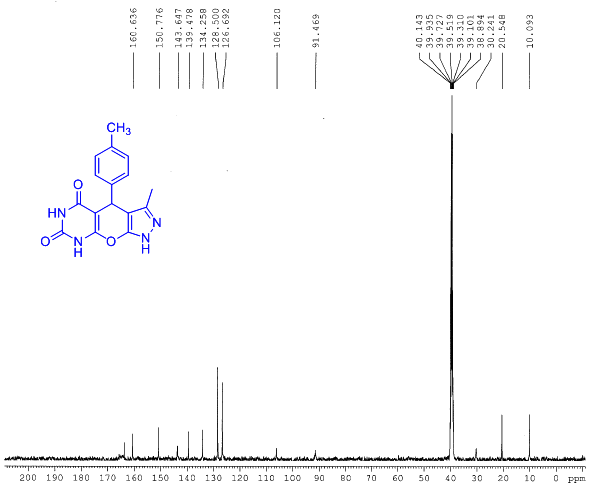


13C NMR Spectrum of compound **5d**

FT-IR Spectrum of compound **5d**


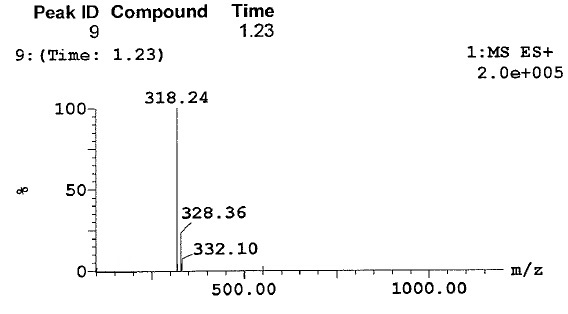


Mass Spectrum of compound **5d**


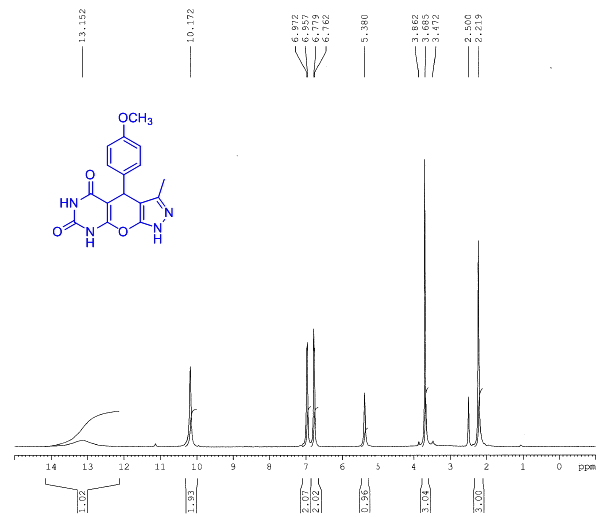


1H NMR Spectrum of compound **5e**


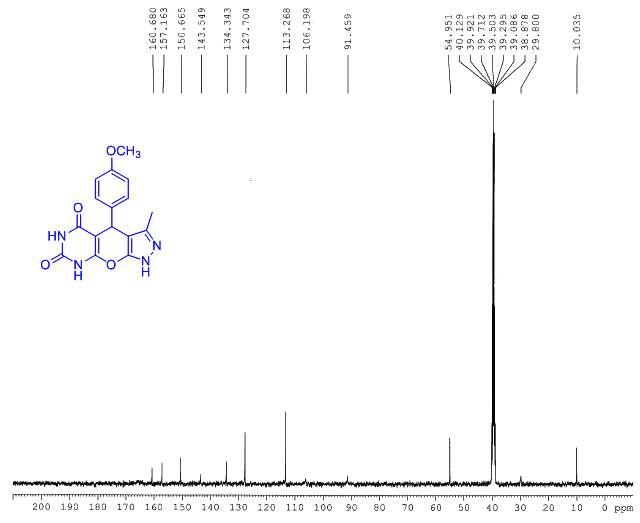


13C NMR Spectrum of compound **5e**

FT-IR Spectrum of compound **5e**


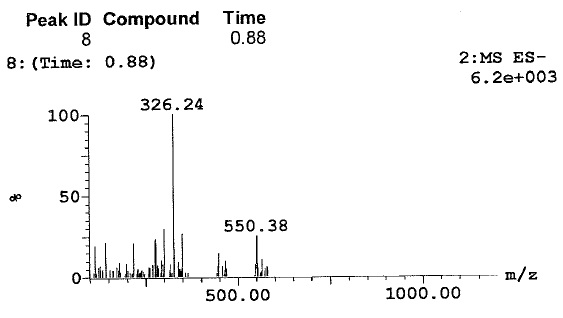


Mass Spectrum of compound **5e**


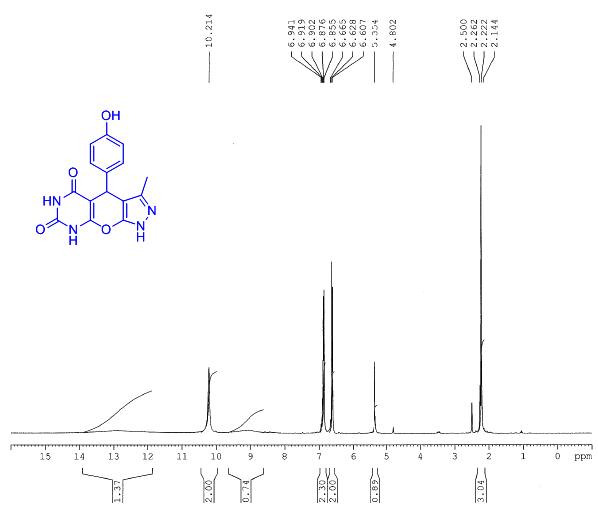


1H NMR Spectrum of compound **5f**


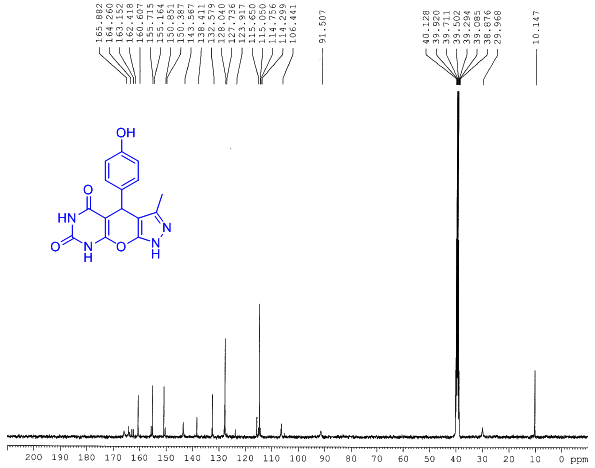


13C NMR Spectrum of compound **5f**

FT-IR Spectrum of compound **5f**


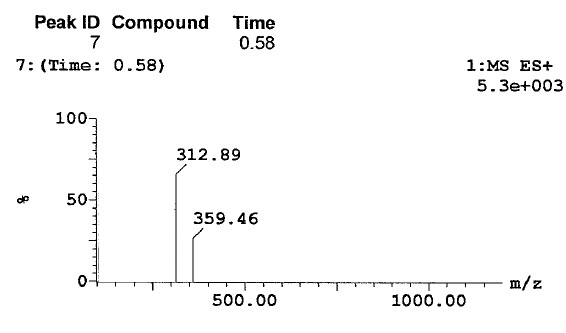


Mass Spectrum of compound **5f**


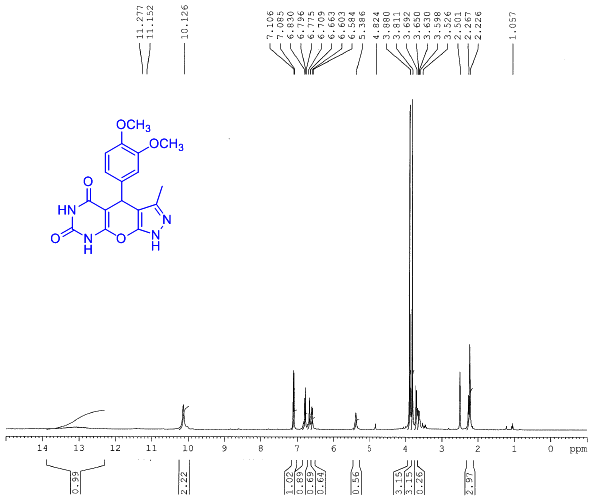


1H NMR Spectrum of compound **5h**


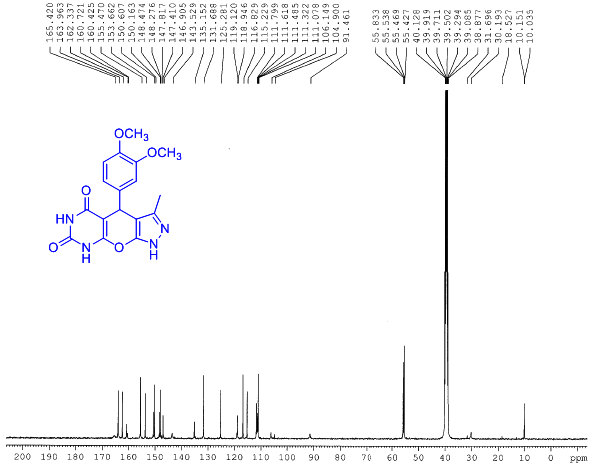


13C NMR Spectrum of compound **5h**


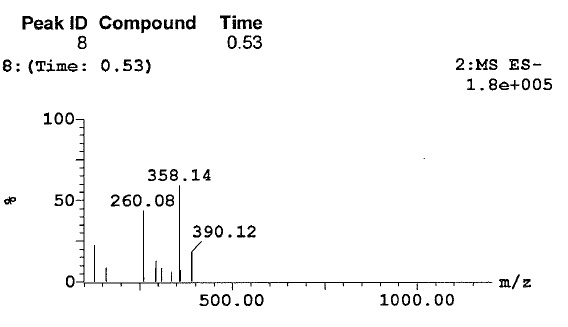


Mass Spectrum of compound **5h**


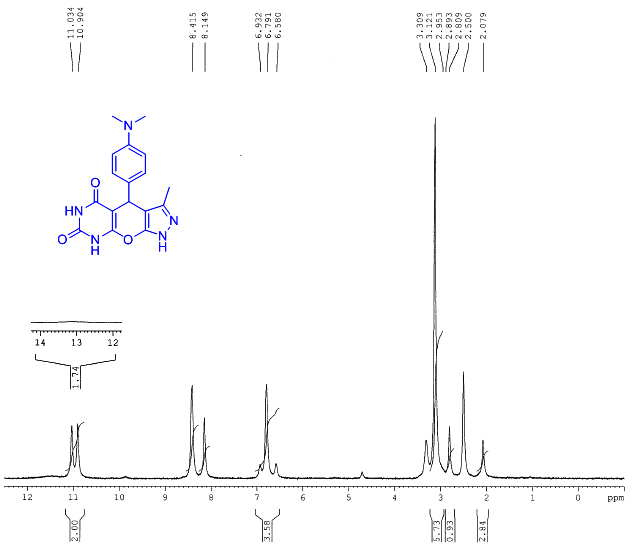


1H NMR Spectrum of compound **5j**


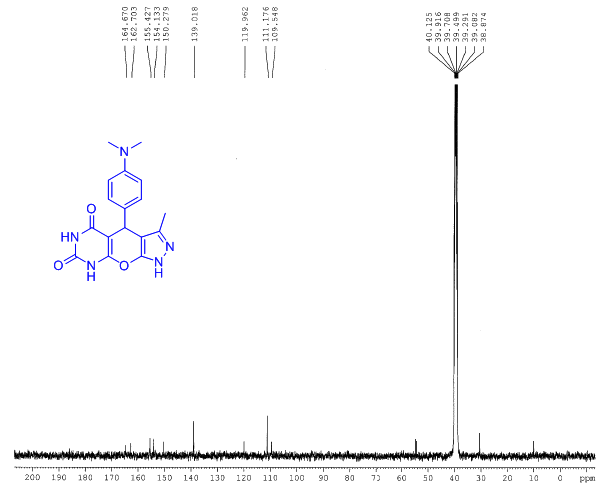


13C NMR Spectrum of compound **5j**

FT-IR Spectrum of compound **5j**

**
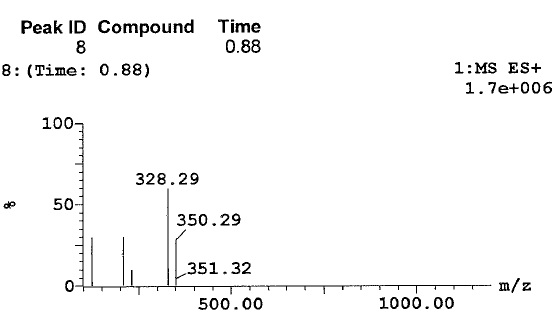
**

Mass Spectrum of compound **5j**


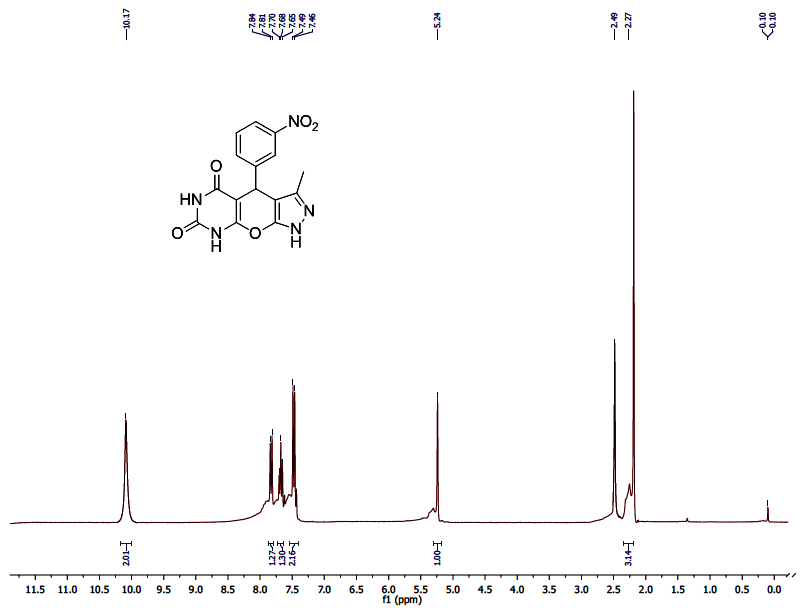


1H NMR Spectrum of compound **5k**


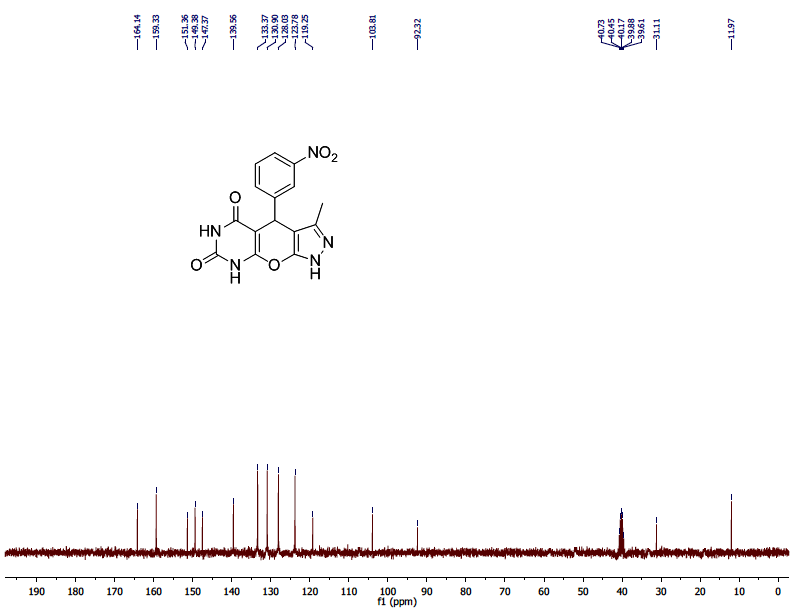


13C NMR Spectrum of compound **5k**

FT-IR Spectrum of compound **5k**


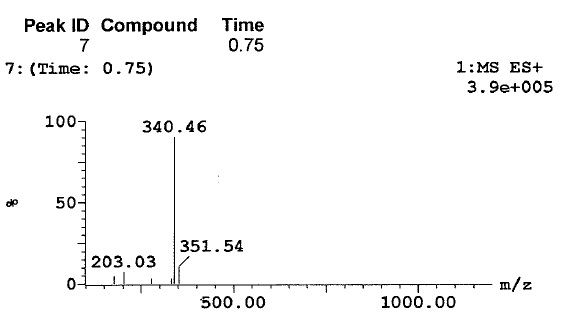


Mass Spectrum of compound **5k**


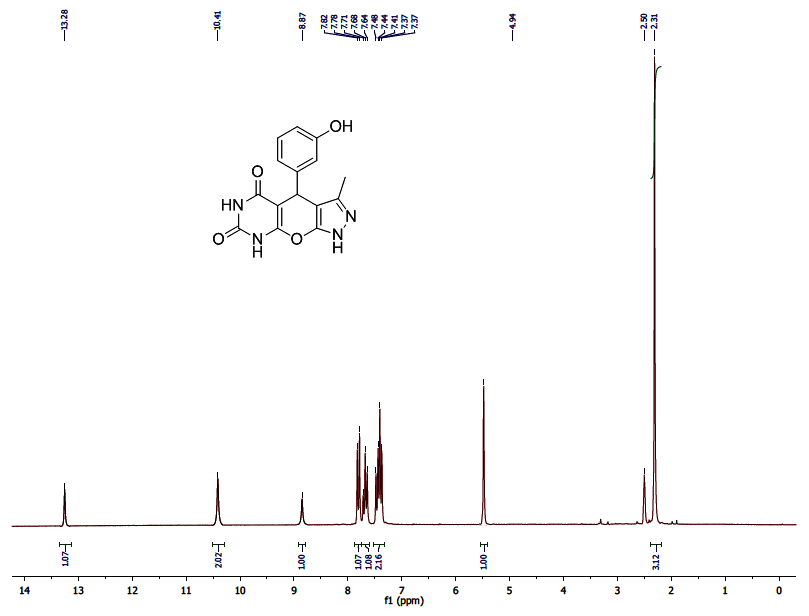


1H NMR Spectrum of compound **5l**


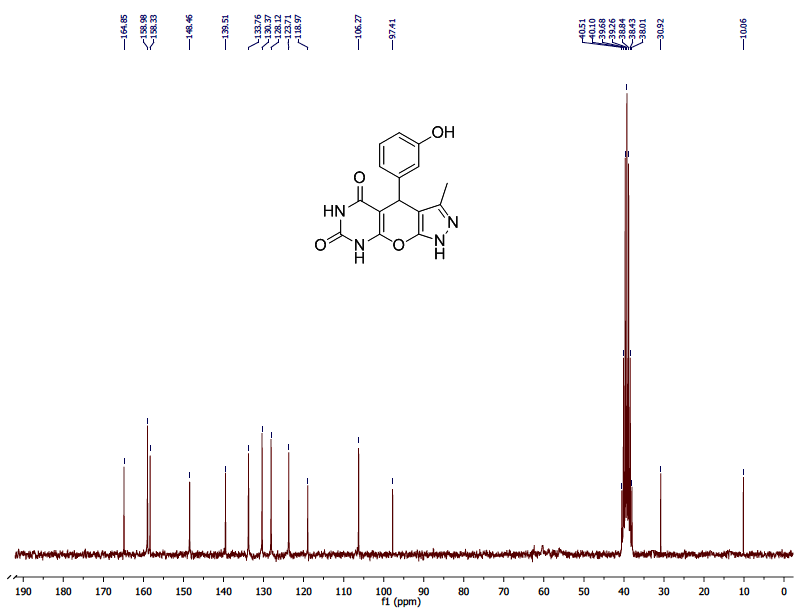


13C NMR Spectrum of compound **5l**


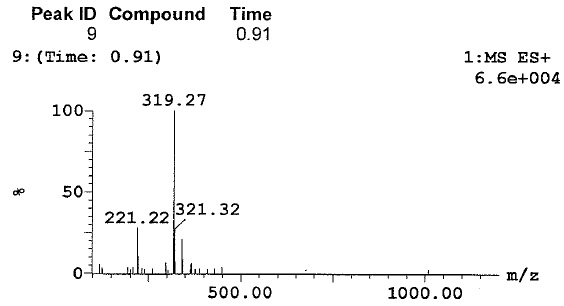


Mass Spectrum of compound **5l**


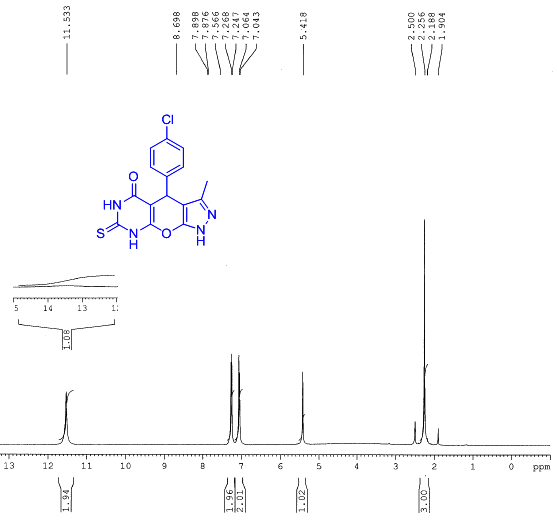


1H NMR Spectrum of compound **7b**


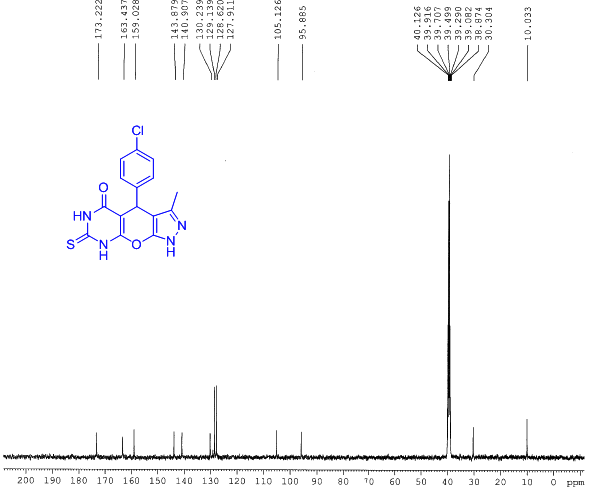


13C NMR Spectrum of compound **7b**

FT-IR Spectrum of compound **7b**


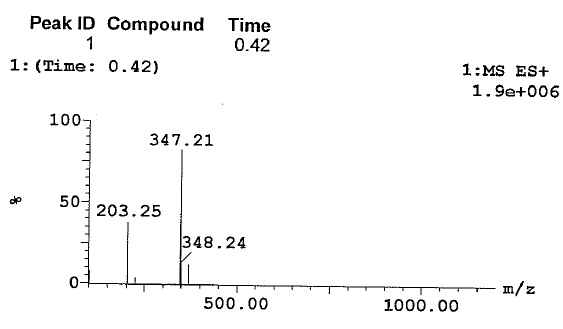


Mass Spectrum of compound **7b**


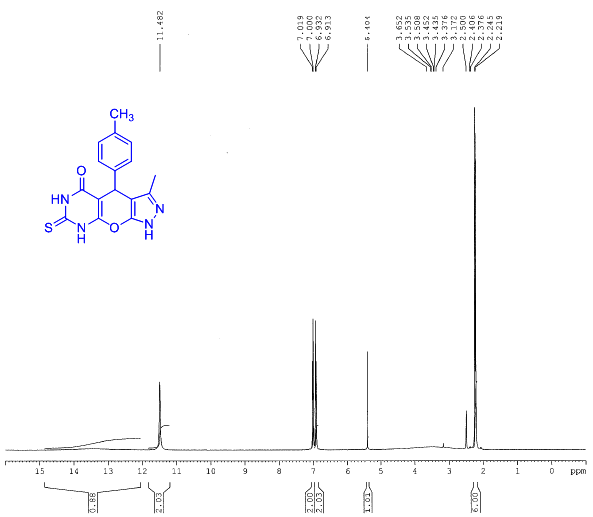


1H NMR Spectrum of compound **7d**


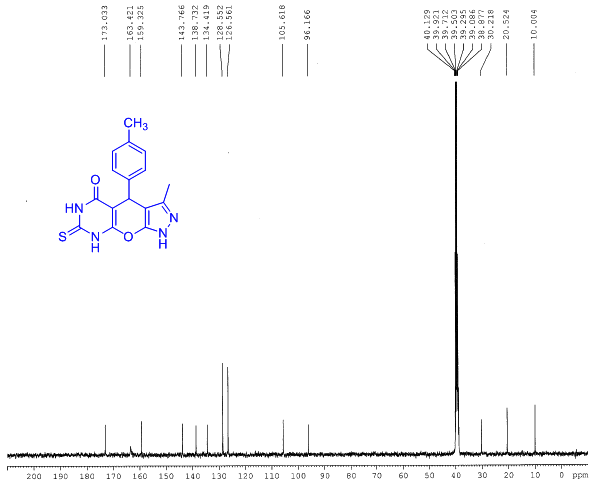


13C NMR Spectrum of compound **7d**

FT-IR Spectrum of compound **7d**

**
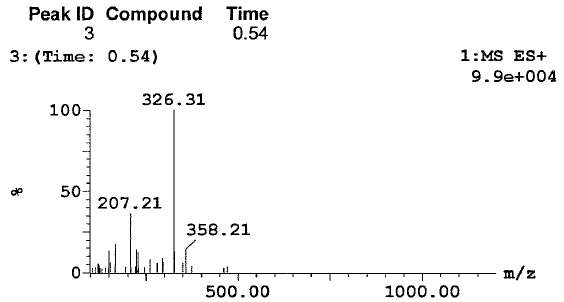
**

Mass Spectrum of compound **7d**


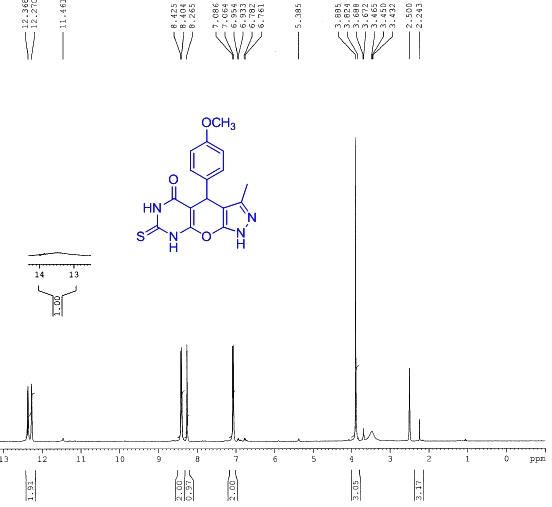


1H NMR Spectrum of compound **7e**


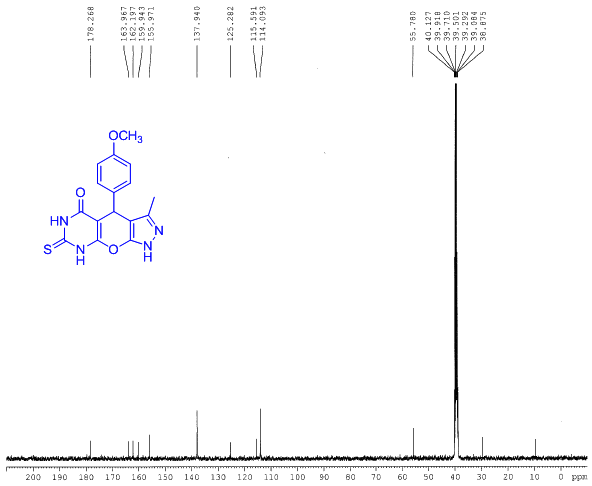


13C NMR Spectrum of compound **7e**


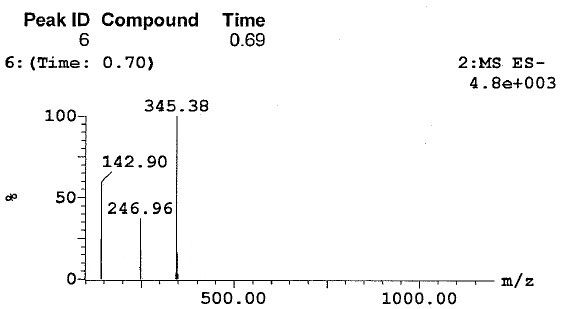


Mass Spectrum of compound **7e**


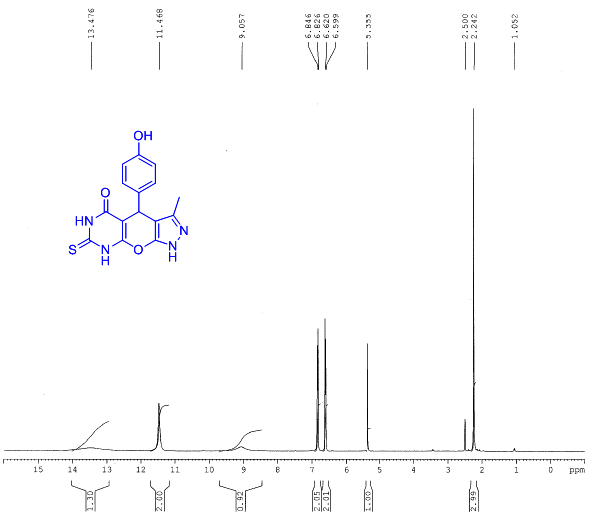


1H NMR Spectrum of compound **7f**


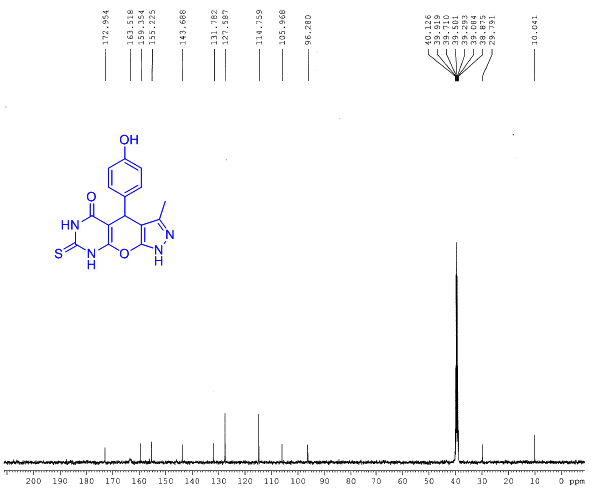


13C NMR Spectrum of compound **7f**

FT-IR Spectrum of compound **7f**


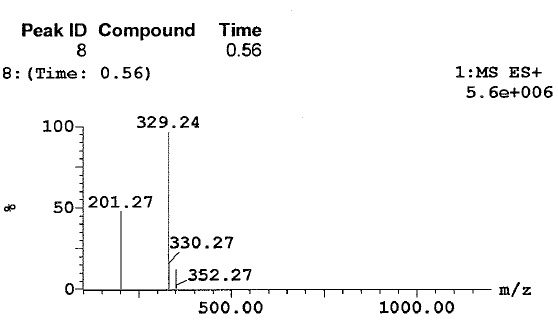


Mass Spectrum of compound **7f**


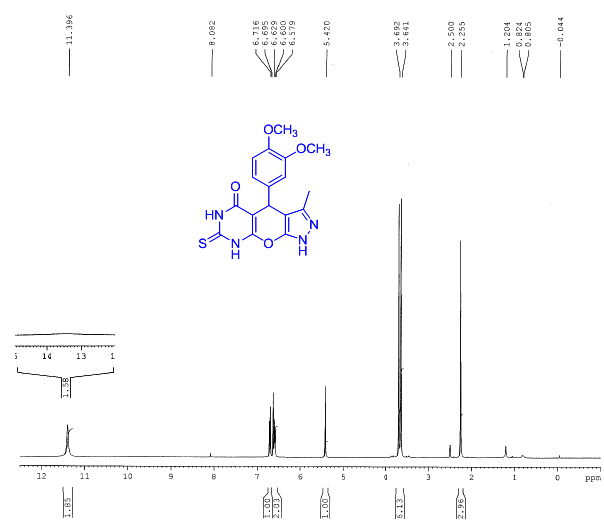


1H NMR Spectrum of compound **7h**


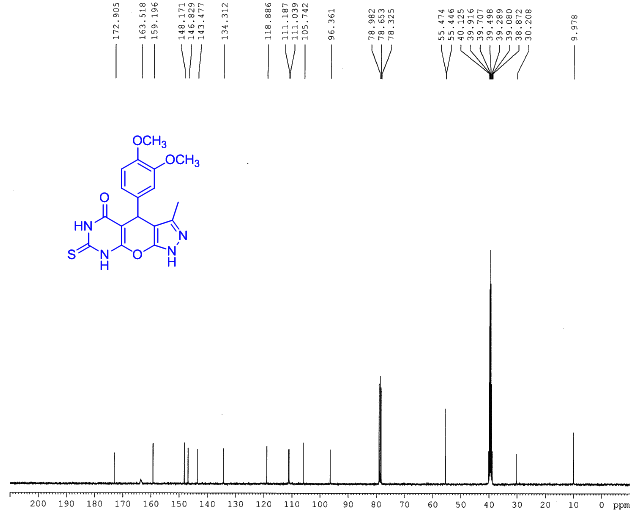


13C NMR Spectrum of compound **7h**


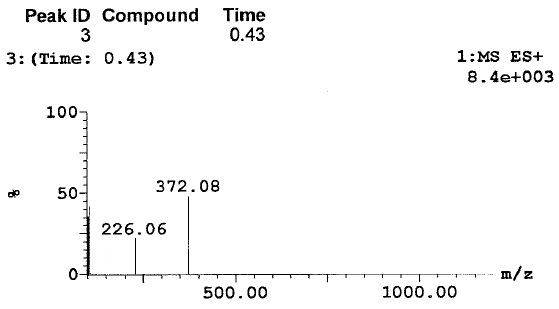


Mass Spectrum of compound **7h**


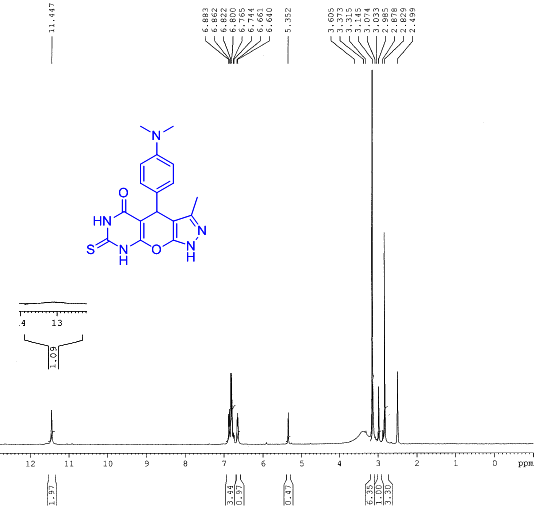


1H NMR Spectrum of compound **7j**


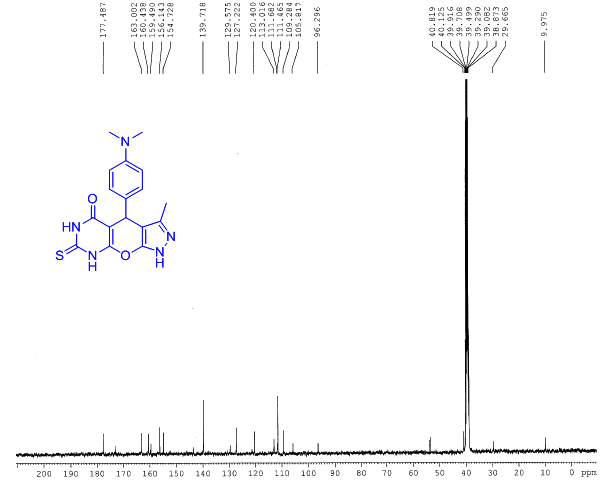


13C NMR Spectrum of compound **7j**

**
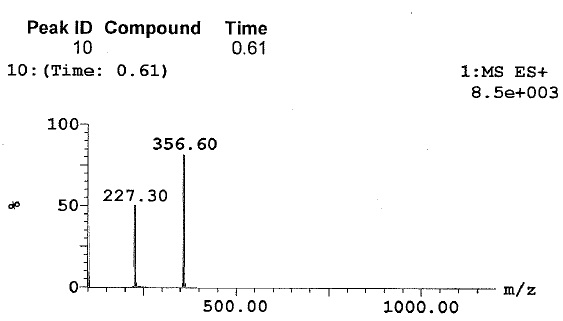
**

Mass Spectrum of compound **7j**


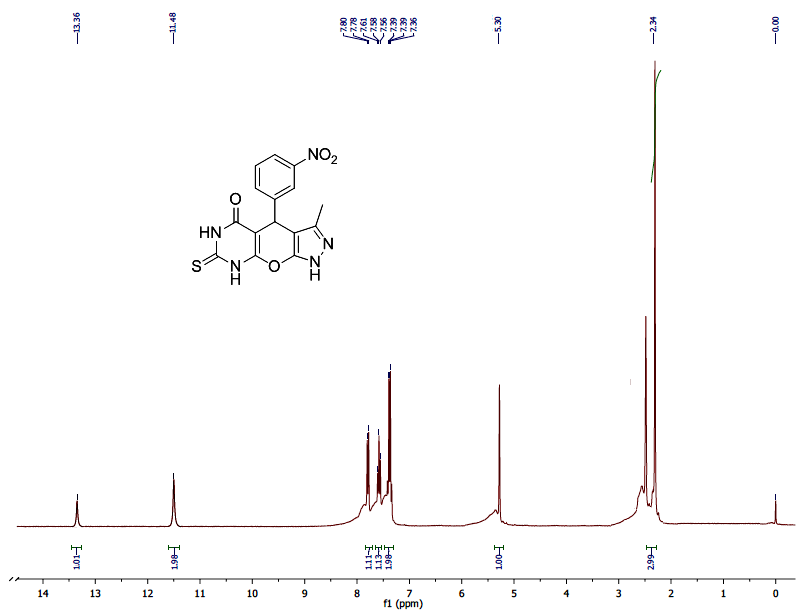


1H NMR Spectrum of compound **7k**


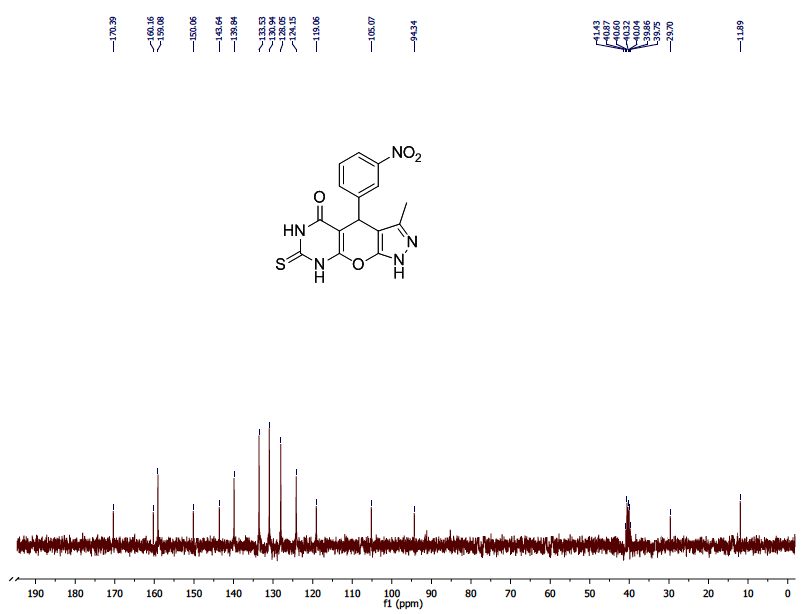


13C NMR Spectrum of compound **7k**

FT-IR Spectrum of compound **7k**

**
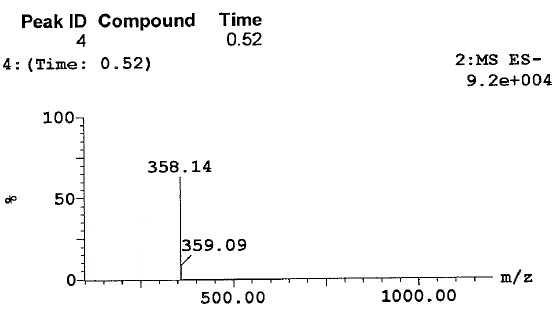
**

Mass Spectrum of compound **7k**


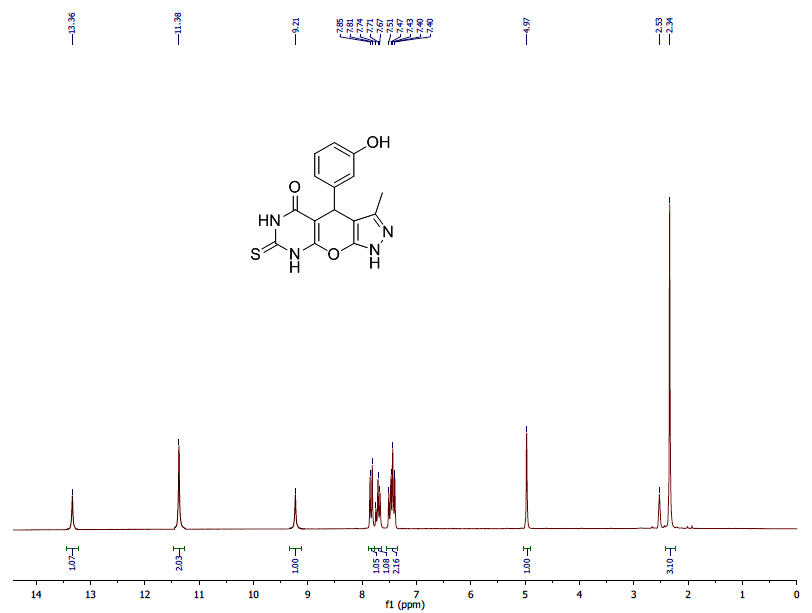


1H NMR Spectrum of compound **7l**


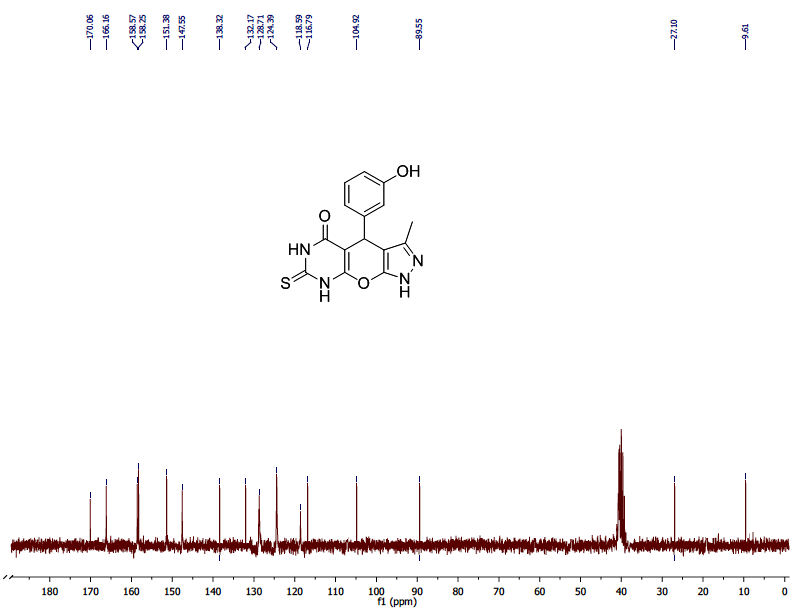


13C NMR Spectrum of compound **7l**


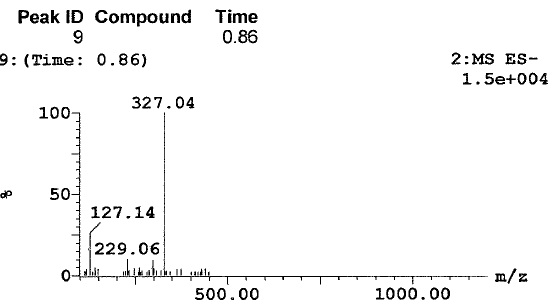


Mass Spectrum of compound **7l**
